# Supplementary material
Source: ML conference proceedings conference paper supplement (https://www.ecva.net/papers/eccv_2020/papers_ECCV/html/123650409_ECCV_2020_paper.php)
Supplement: Supplementary file 2 [file 123650409-supp.zip]

Archive with 10 entries (7 files):
- ECCV2020_supplementary_3492#_FINAL/
- ECCV2020_supplementary_3492#_FINAL/ECCV2020_supplementary_3492#.pdf
- ECCV2020_supplementary_3492#_FINAL/examples_of_experimental_results/
- ECCV2020_supplementary_3492#_FINAL/examples_of_experimental_results/fig8 video CoutrotII.mp4
- ECCV2020_supplementary_3492#_FINAL/examples_of_experimental_results/fig8 video MVVA.mp4
- ECCV2020_supplementary_3492#_FINAL/examples_of_experimental_results/other_results.mp4
- ECCV2020_supplementary_3492#_FINAL/examples_of_visual-only_and_visual-audio attention/
- ECCV2020_supplementary_3492#_FINAL/examples_of_visual-only_and_visual-audio attention/fig1_video.mp4
- ECCV2020_supplementary_3492#_FINAL/examples_of_visual-only_and_visual-audio attention/fig4a_video.mp4
- ECCV2020_supplementary_3492#_FINAL/examples_of_visual-only_and_visual-audio attention/fig4b_video.mp4
